# Supplementary material for: Synthesis, structure, and luminescent properties of oligothiophene-containing metal–organic frameworks
Source: Royal Society of Chemistry journal article supplement (doi:10.1039/c2ce25529d), 2012-01-01
Supplement: c2ce25529d.pdf [file c2ce25529d.pdf]

**Electronic Supporting Information**

**Synthesis, structure, and luminescent properties of  
oligothiophene-containing metal-organic frameworks**

Lyndsey D. Earl, Brian O. Patrick and Michael O. Wolf\*

**Table S1:** Selected crystallographic data for **1-5**.

|                                        | <b>1</b>                                                                                      | <b>2</b>                                                          | <b>3</b>                                                         | <b>4</b>                                                                        | <b>5</b>                                                                                          |
|----------------------------------------|-----------------------------------------------------------------------------------------------|-------------------------------------------------------------------|------------------------------------------------------------------|---------------------------------------------------------------------------------|---------------------------------------------------------------------------------------------------|
| Formula                                | C <sub>57</sub> H <sub>59</sub> N <sub>5</sub> O <sub>11</sub> S <sub>4</sub> Zn <sub>2</sub> | C <sub>24</sub> H <sub>35</sub> NO <sub>4</sub> S <sub>2</sub> Zn | C <sub>16</sub> H <sub>9</sub> NO <sub>4</sub> S <sub>2</sub> Zn | C <sub>40</sub> H <sub>36</sub> N <sub>4</sub> O <sub>6</sub> S <sub>2</sub> Zn | C <sub>201</sub> H <sub>257</sub> N <sub>15</sub> O <sub>32</sub> S <sub>12</sub> Zn <sub>6</sub> |
| Crystal color, shape                   | Colorless, rod                                                                                | Colorless, rod                                                    | Yellow, rod                                                      | Colorless, prism                                                                | Yellow, prism                                                                                     |
| Dimensions / mm                        | 0.35 x 0.20 x 0.10                                                                            | 0.10 x 0.04 x 0.02                                                | 0.25 x 0.10 x 0.07                                               | 0.70 x 0.30 x 0.25                                                              | 0.25 x 0.18 x 0.13                                                                                |
| Temperature / K                        | 100 (2)                                                                                       | 100(2)                                                            | 100(2)                                                           | 100(2)                                                                          | 100(2)                                                                                            |
| Crystal system                         | Monoclinic                                                                                    | Monoclinic                                                        | Monoclinic                                                       | Triclinic                                                                       | Monoclinic                                                                                        |
| Space Group                            | P 2 <sub>1</sub> /n                                                                           | P 2 <sub>1</sub> /n                                               | C 2/c                                                            | P-1                                                                             | C 2/c                                                                                             |
| a / Å                                  | 16.3642(6)                                                                                    | 7.503(3)                                                          | 17.1764(8)                                                       | 8.6855(15)                                                                      | 31.138(2)                                                                                         |
| b / Å                                  | 17.0748(6)                                                                                    | 18.281(6)                                                         | 22.0141(12)                                                      | 12.7109(18)                                                                     | 39.627(2)                                                                                         |
| c / Å                                  | 20.6230(7)                                                                                    | 19.375(6)                                                         | 9.9312(5)                                                        | 18.183(3)                                                                       | 22.721(2)                                                                                         |
| α / deg                                | 90.00                                                                                         | 90.00                                                             | 90.00                                                            | 91.810(9)                                                                       | 90.00                                                                                             |
| β / deg                                | 90.226(2)                                                                                     | 100.470(15)                                                       | 96.535(2)                                                        | 102.910(9)                                                                      | 121.737(2)                                                                                        |
| γ / deg                                | 90.00                                                                                         | 90.00                                                             | 90.00                                                            | 106.455(8)                                                                      | 90.00                                                                                             |
| V / Å <sup>3</sup>                     | 5762.3(4)                                                                                     | 2613.3(16)                                                        | 3730.8(3)                                                        | 1866.8(5)                                                                       | 23844(3)                                                                                          |
| Z                                      | 4                                                                                             | 4                                                                 | 8                                                                | 2                                                                               | 4                                                                                                 |
| 2θ (max) / deg                         | 60.2                                                                                          | 45.2                                                              | 60.0                                                             | 46.6                                                                            | 52.6                                                                                              |
| Exposure time / s                      | 10                                                                                            | 30                                                                | 10                                                               | 20                                                                              | 60                                                                                                |
| Total reflections                      | 99492                                                                                         | 11499                                                             | 20371                                                            | 19580                                                                           | 16035                                                                                             |
| Unique reflections                     | 16899                                                                                         | 3392                                                              | 5427                                                             | 5356                                                                            | 10893                                                                                             |
| ρ <sub>calc</sub> / g cm <sup>-3</sup> | 1.44                                                                                          | 1.35                                                              | 1.455                                                            | 1.420                                                                           | 1.162                                                                                             |
| μ (Mo Kα) / mm <sup>-1</sup>           | 1.041                                                                                         | 1.128                                                             | 1.557                                                            | 0.823                                                                           | 0.761                                                                                             |
| R1 <sup>a</sup> (I > 2.00σ(I))         | 0.0525                                                                                        | 0.0638                                                            | 0.0420                                                           | 0.0515                                                                          | 0.0542                                                                                            |
| wR2 <sup>a</sup> (I > 2.00σ(I))        | 0.1425                                                                                        | 0.1788                                                            | 0.1102                                                           | 0.1314                                                                          | 0.1611                                                                                            |
| Goodness of fit                        | 1.101                                                                                         | 0.952                                                             | 0.962                                                            | 1.017                                                                           | 1.078                                                                                             |

<sup>a</sup>Function minimized.  $\sum w(F_o^2 - F_c^2)^2$ ,  $R1 = \sum ||F_o| - |F_c|| / \sum |F_o|$ ,  $wR2 = [\sum (w (F_o^2 - F_c^2)^2) / \sum w(F_o^2)^2]^{1/2}$

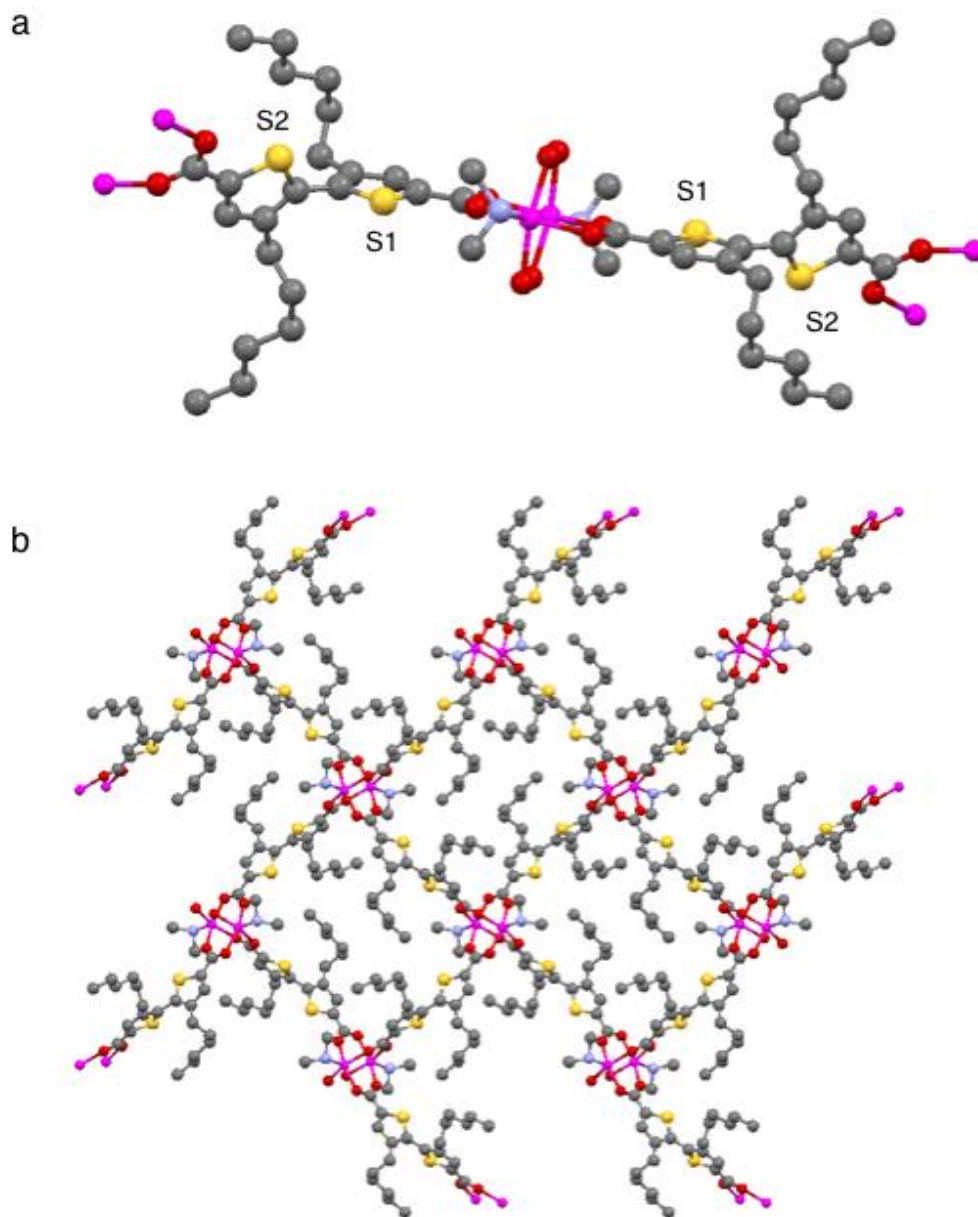

**Figure S1.** Solid state structure of **2**. Hydrogens have been removed for clarity. a) Metal coordination of **2**. b) 2D grid along the *bc* plane.

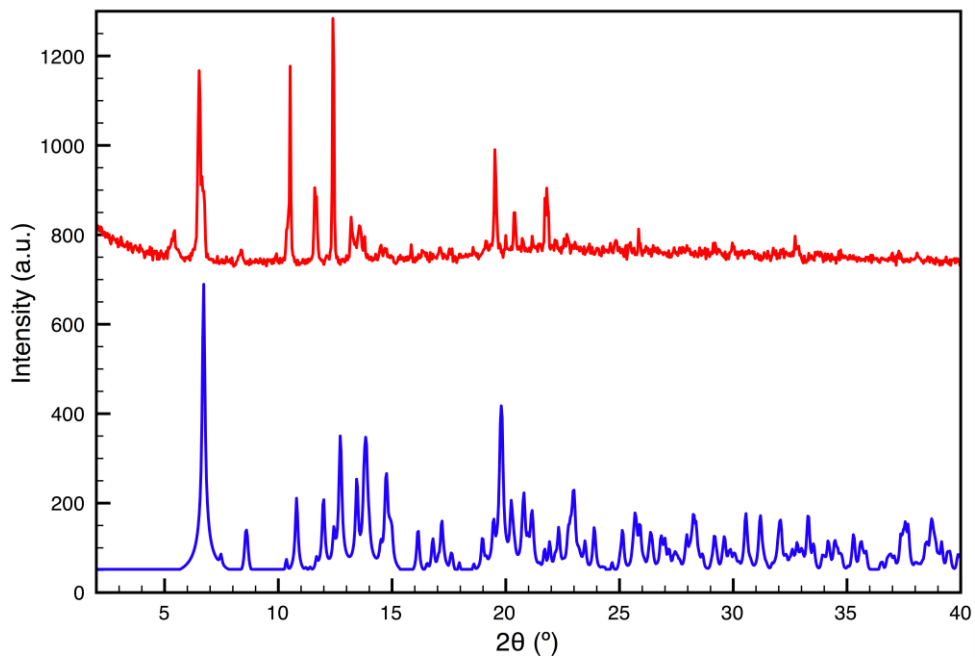

**Figure S2.** Powder X-ray diffraction patterns of **1**: experimental (red) and predicted (blue).

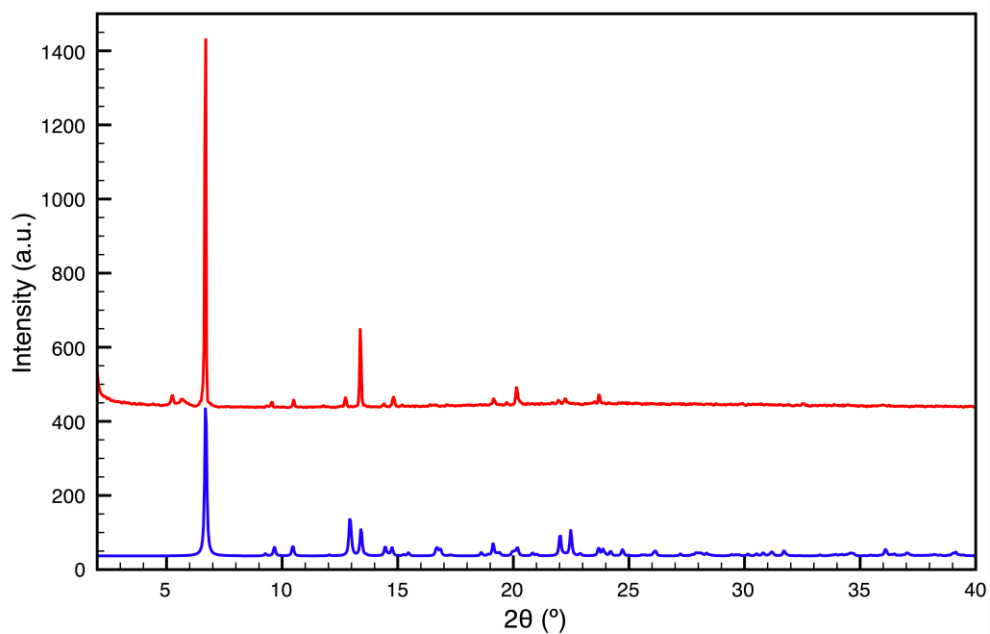

**Figure S3.** Powder X-ray diffraction patterns of **2**: experimental (red) and predicted (blue).

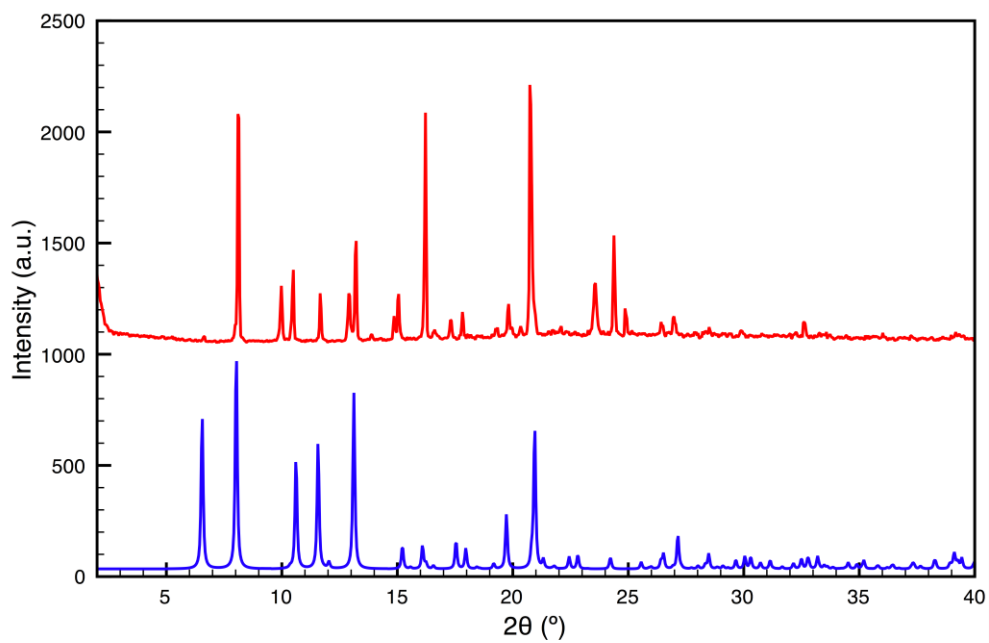

**Figure S4.** Powder X-ray diffraction patterns of **3**: experimental (red) and predicted (blue).

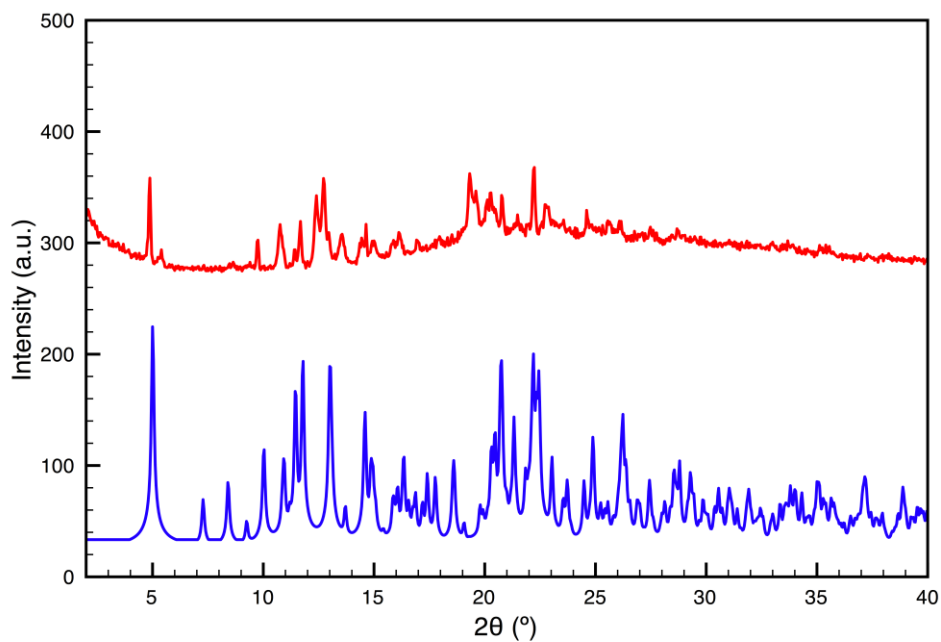

**Figure S5.** Powder X-ray diffraction patterns of **4**: experimental (red) and predicted (blue).

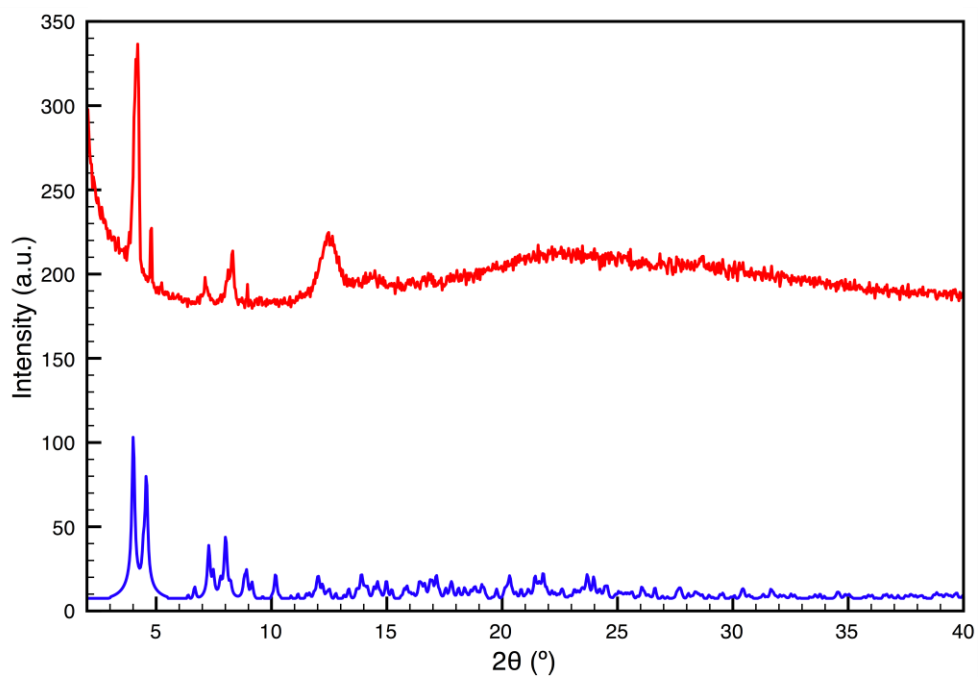

**Figure S6.** Powder X-ray diffraction patterns of **5**: experimental (red) and predicted (blue).

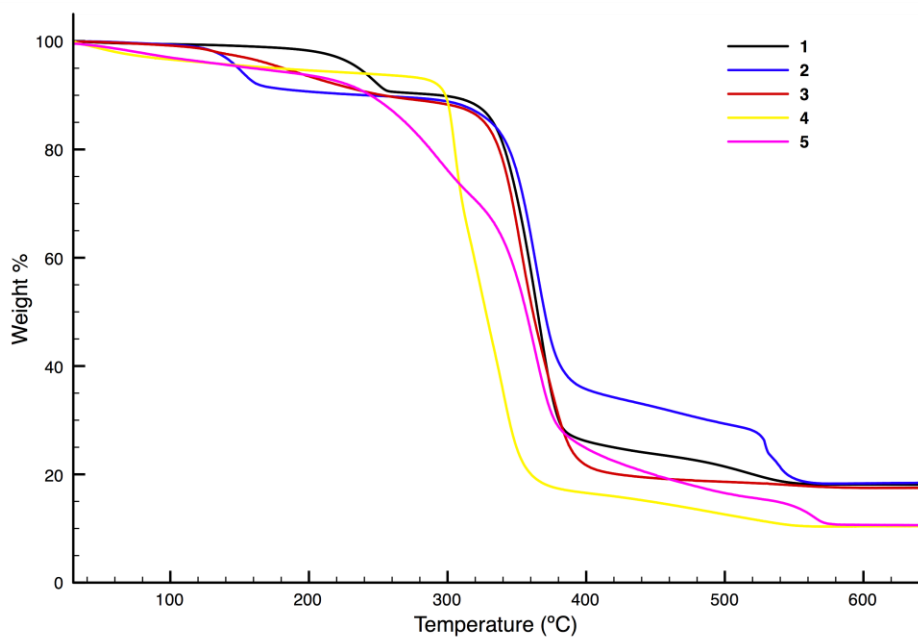

**Figure S7.** Thermogravimetric analyses of compounds **1-5**.

**Table S2.** Summary of thermogravimetric analyses data of compounds **1-5**.

|          | Initial temperature of major weight loss (°C) | Final weight (%) (experimental) | Final weight (%) (calculated) |
|----------|-----------------------------------------------|---------------------------------|-------------------------------|
| <b>1</b> | 220, 340                                      | 13.6                            | 13.0                          |
| <b>2</b> | 130, 315, 525                                 | 15.1                            | 15.3                          |
| <b>3</b> | 130, 320                                      | 16.2                            | 14.5                          |
| <b>4</b> | 300, 370                                      | 9.4                             | 10.1                          |
| <b>5</b> | 240, 400                                      | 10.7                            | 11.5                          |

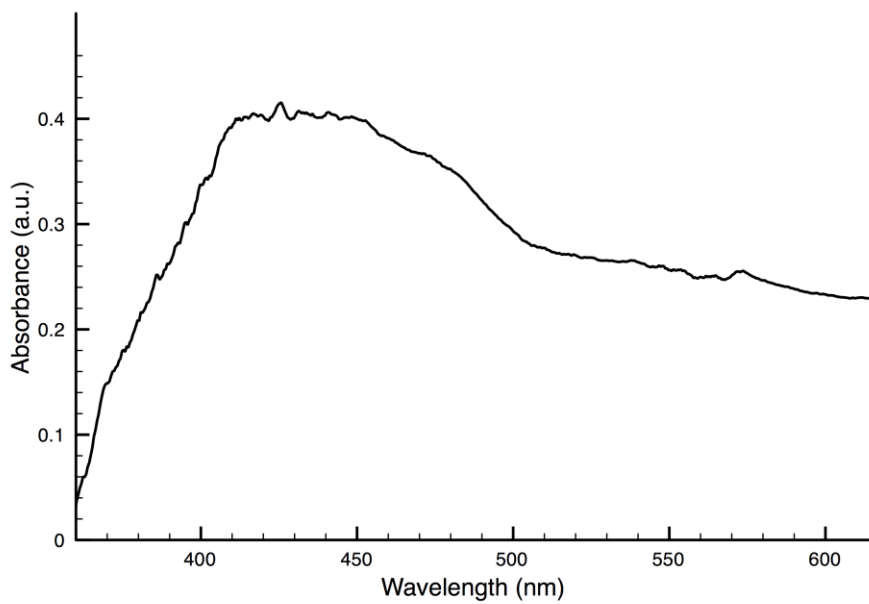

**Figure S8.** Solid state UV-Vis spectrum (derived from diffuse reflectance spectrum) of bpe.

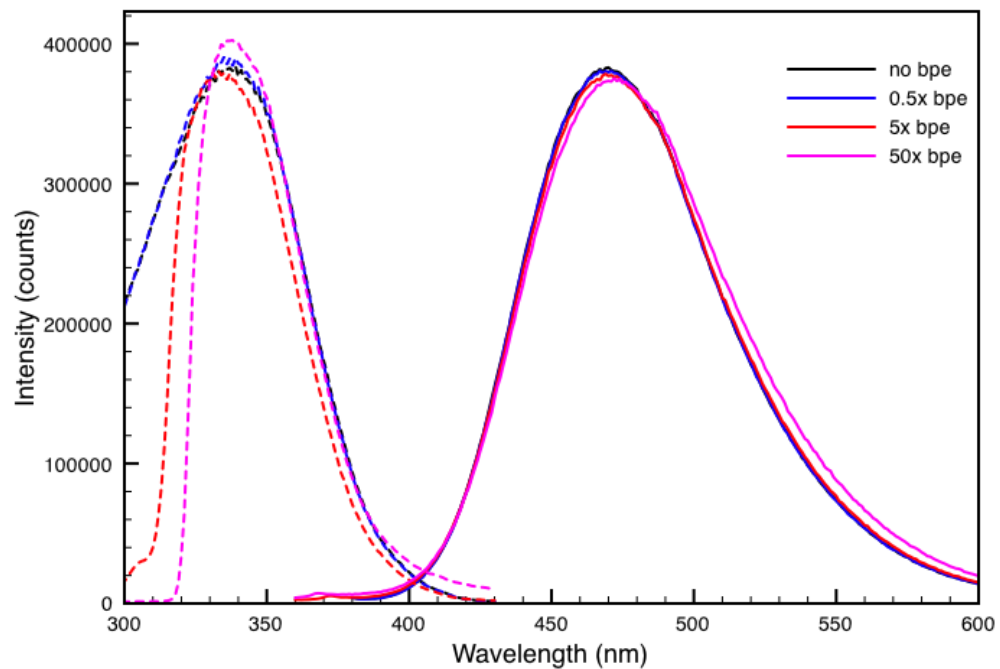

**Figure S9.** Excitation and emission spectra of H<sub>2</sub>L1 and bpe in MeOH. [H<sub>2</sub>L1] = 1 × 10<sup>-5</sup> M.

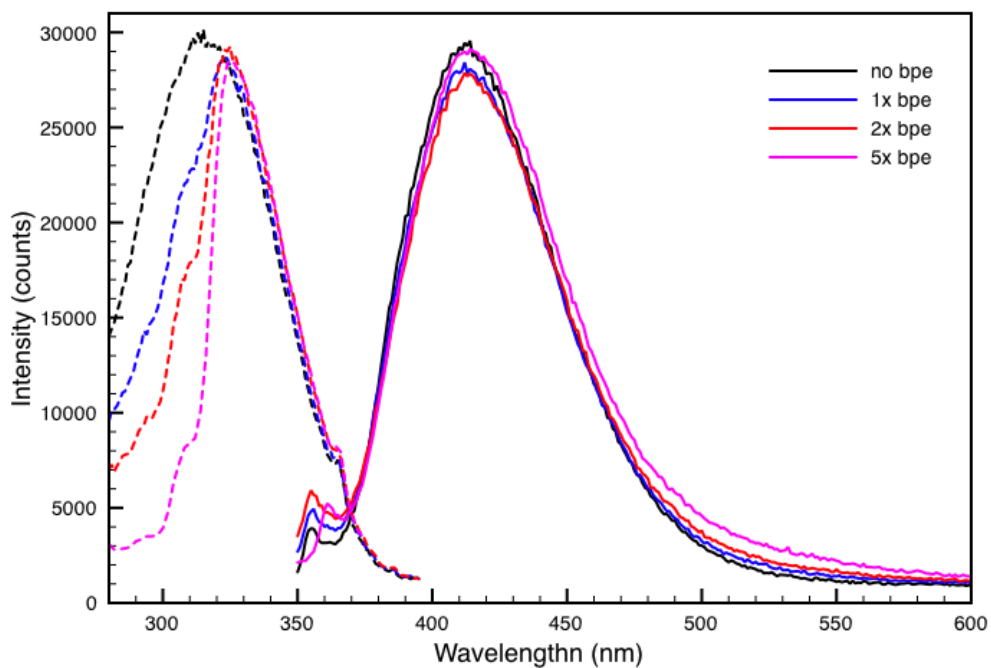

**Figure S10.** Excitation and emission spectra of H<sub>2</sub>L2 and bpe in MeOH. [H<sub>2</sub>L2] = 1.25 × 10<sup>-5</sup> M.



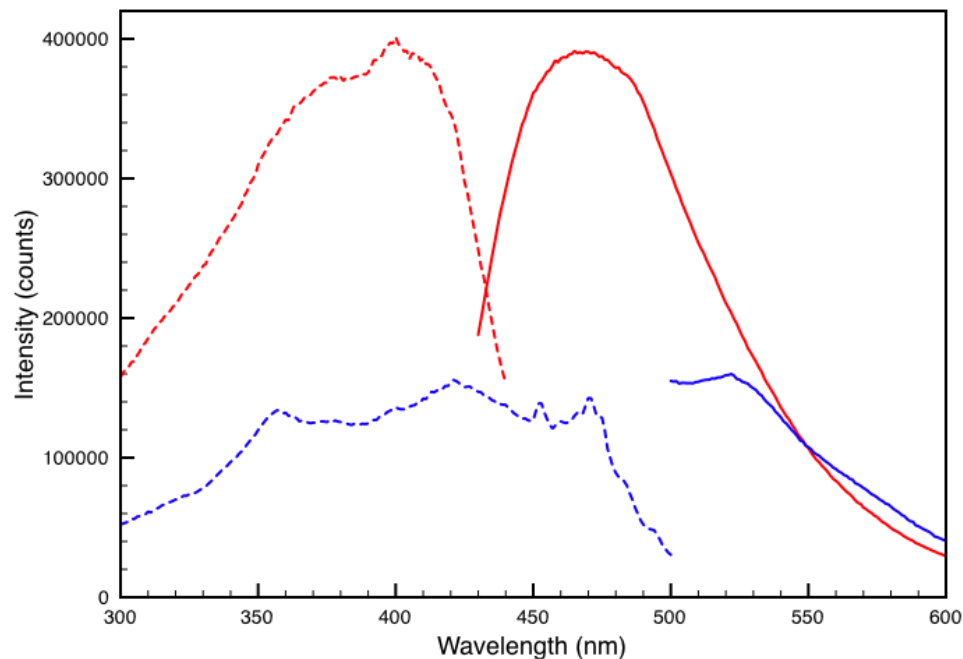

**Figure S11.** Excitation and emission spectra of 1:1 H<sub>2</sub>L1 and bpe in the solid state.  $\lambda_{\text{ex}}$  470 nm (dashed red),  $\lambda_{\text{ex}}$  540 nm (dashed blue),  $\lambda_{\text{em}}$  400 nm (solid red),  $\lambda_{\text{em}}$  475 nm (solid blue).

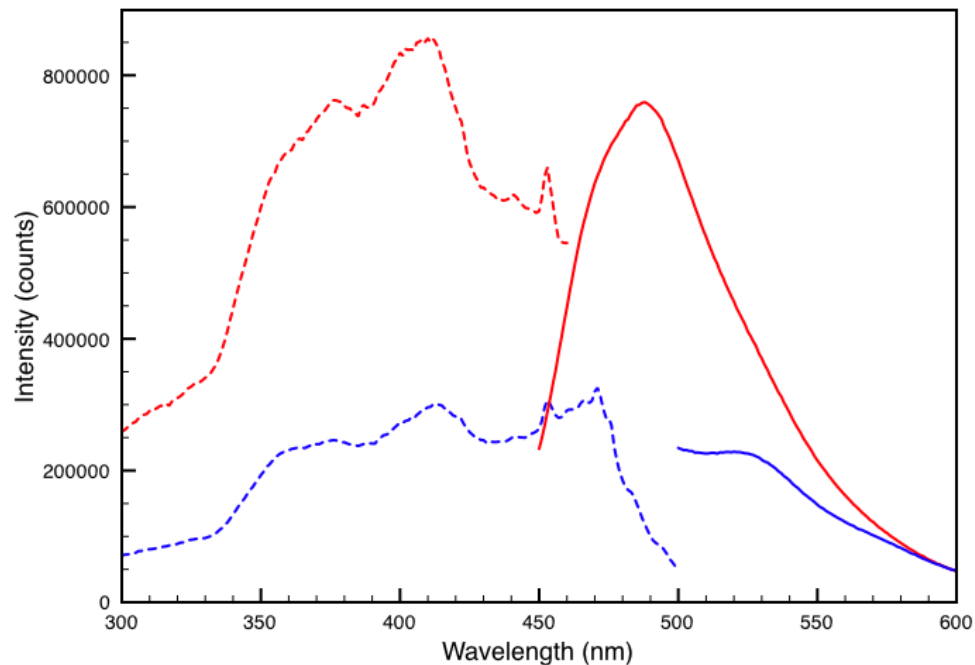

**Figure S12.** Excitation and emission spectra of 3:2 H<sub>2</sub>L2 and bpe in the solid state.  $\lambda_{\text{ex}}$  490 nm (dashed red),  $\lambda_{\text{ex}}$  540 nm (dashed blue),  $\lambda_{\text{em}}$  415 nm (solid red),  $\lambda_{\text{em}}$  480 nm (solid blue).
